# Supplementary material for: Formation and characterization of a six-coordinate iron(iii) complex with the most ruffled porphyrin ring
Source: Royal Society of Chemistry journal article supplement (doi:10.1039/c1dt10042d), 2011-01-01
Supplement: c1dt10042d.pdf [file c1dt10042d.pdf]

## **Supporting Informations**

### **Formation and characterization of six-coordinate iron(III) complex with the most ruffled porphyrin ring**

Akira Ikezaki<sup>ab</sup> and Mikio Nakamura<sup>\*abc</sup>

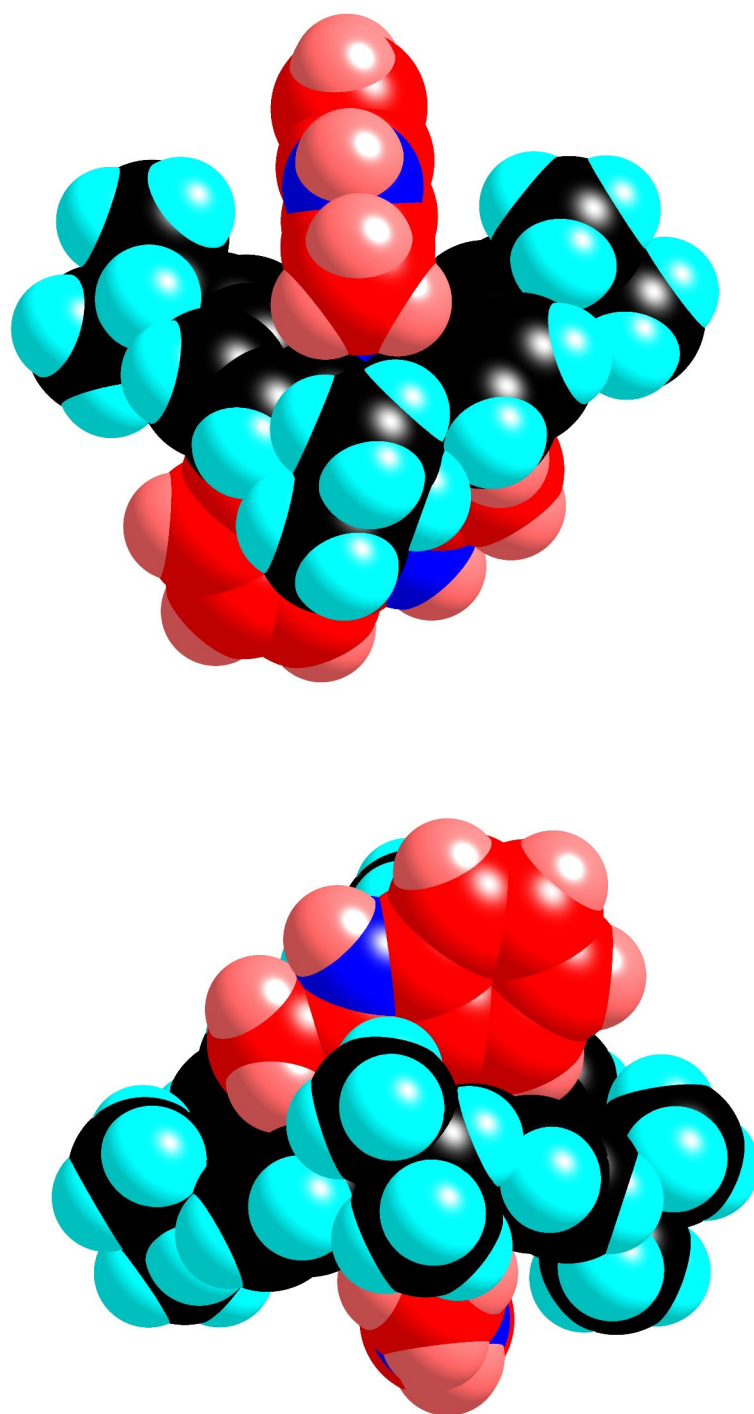

**Fig. S1.** Molecular structure of  $[\text{Fe}(\text{T}^i\text{PrP})(2\text{-MeBzIm})_2]^+$  (**1**) presented by CPK model, where C, H, N atoms in the porphyrin core are expressed by black, cyan, and blue, respectively, and C, H, N atoms in the coordinating 2-MeBzIm ligands are expressed by red, pink, and blue, respectively.

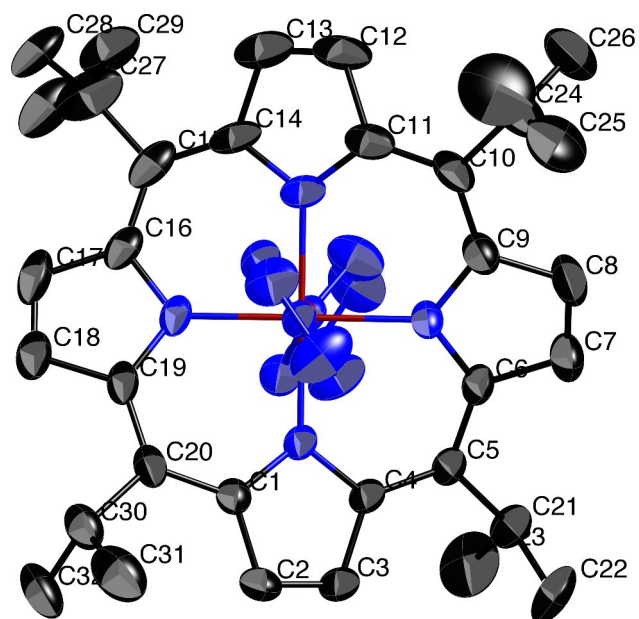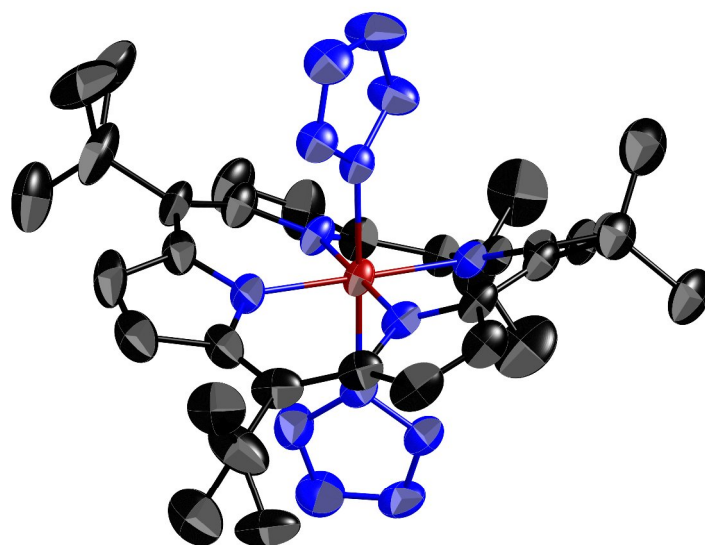

**Fig. S2.** Molecular structure of  $[\text{Fe}(\text{T}^i\text{PrP})(\text{HIm})_2]^+(2)$ . Thermal ellipsoids are drawn to enclose 50 % probability.

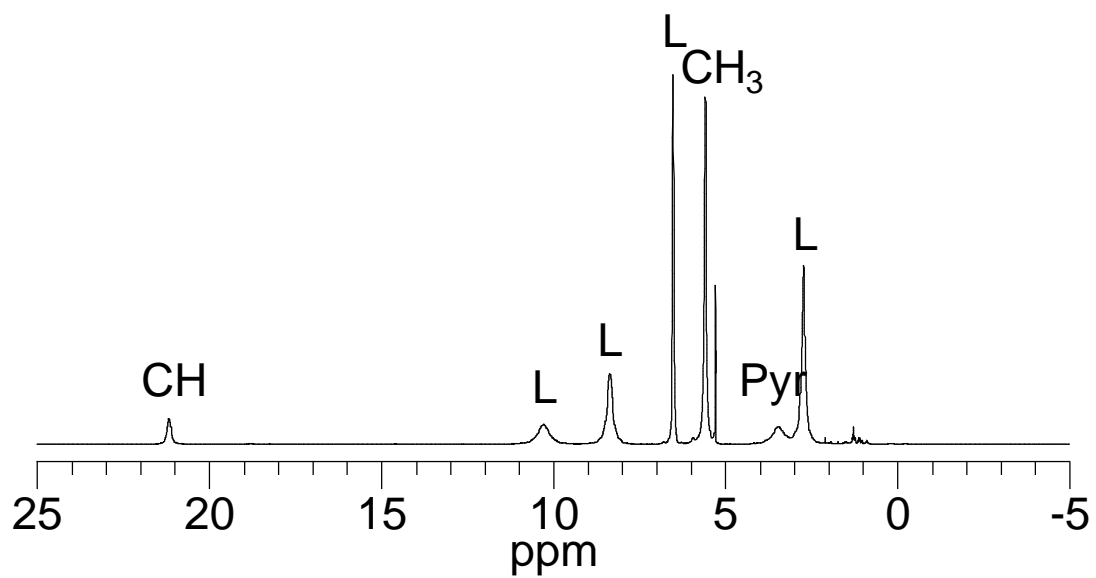

**Fig. S3.**  $^1\text{H}$  NMR spectrum of **1** taken in  $\text{CD}_2\text{Cl}_2$  at 298 K.

**Table S1.** Crystal data and structure refinement for [Fe(T<sup>i</sup>PrP)(2-MeBzIm)<sub>2</sub>](ClO<sub>4</sub>) (1).

|                                   |                                                                                  |          |
|-----------------------------------|----------------------------------------------------------------------------------|----------|
| Empirical formula                 | C <sub>50</sub> H <sub>54</sub> Cl <sub>7</sub> Fe N <sub>8</sub> O <sub>4</sub> |          |
| Formula weight                    | 1135.01                                                                          |          |
| Temperature                       | 223 K                                                                            |          |
| Wavelength                        | 0.71073 Å                                                                        |          |
| Crystal system                    | Orthorhombic                                                                     |          |
| Space group                       | Pca2(1)                                                                          |          |
| Unit cell dimensions              | a = 43.200(9) Å                                                                  | α = 90°. |
|                                   | b = 11.700(2) Å                                                                  | β = 90°. |
|                                   | c = 10.682(2) Å                                                                  | γ = 90°. |
| Volume                            | 5399.1(18) Å <sup>3</sup>                                                        |          |
| Z                                 | 4                                                                                |          |
| Density (calculated)              | 1.396 Mg/m <sup>3</sup>                                                          |          |
| Absorption coefficient            | 0.677 mm <sup>-1</sup>                                                           |          |
| F(000)                            | 2348                                                                             |          |
| Crystal size                      | 0.48 x 0.14 x 0.06 mm <sup>3</sup>                                               |          |
| Theta range for data collection   | 0.94 to 25.17°.                                                                  |          |
| Index ranges                      | -51 ≤ h ≤ 45, -13 ≤ k ≤ 12, -12 ≤ l ≤ 12                                         |          |
| Reflections collected             | 27760                                                                            |          |
| Independent reflections           | 9301 [R(int) = 0.1792]                                                           |          |
| Completeness to theta = 25.17°    | 99.6 %                                                                           |          |
| Absorption correction             | Analytical                                                                       |          |
| Max. and min. transmission        | 0.9605 and 0.7372                                                                |          |
| Refinement method                 | Full-matrix least-squares on F <sup>2</sup>                                      |          |
| Data / restraints / parameters    | 9301 / 1 / 641                                                                   |          |
| Goodness-of-fit on F <sup>2</sup> | 0.916                                                                            |          |
| Final R indices [I > 2σ(I)]       | R1 = 0.0641, wR2 = 0.1307                                                        |          |
| R indices (all data)              | R1 = 0.1042, wR2 = 0.1487                                                        |          |
| Absolute structure parameter      | -0.01(3)                                                                         |          |
| Largest diff. peak and hole       | 0.645 and -0.608 e.Å <sup>-3</sup>                                               |          |

**Table S2.** Crystal data and structure refinement for [Fe(T<sup>†</sup>PrP)(HIm)<sub>2</sub>](ClO<sub>4</sub>) (2).

|                                   |                                                                                  |                |
|-----------------------------------|----------------------------------------------------------------------------------|----------------|
| Empirical formula                 | C <sub>45</sub> H <sub>57</sub> Cl <sub>4</sub> Fe N <sub>8</sub> O <sub>4</sub> |                |
| Formula weight                    | 971.64                                                                           |                |
| Temperature                       | 223 K                                                                            |                |
| Wavelength                        | 0.71073 Å                                                                        |                |
| Crystal system                    | Monoclinic                                                                       |                |
| Space group                       | P2(1)/c                                                                          |                |
| Unit cell dimensions              | a = 9.4670(19) Å                                                                 | α = 90°.       |
|                                   | b = 40.940(8) Å                                                                  | β = 98.23(3)°. |
|                                   | c = 12.708(3) Å                                                                  | γ = 90°.       |
| Volume                            | 4874.7(17) Å <sup>3</sup>                                                        |                |
| Z                                 | 4                                                                                |                |
| Density (calculated)              | 1.324 Mg/m <sup>3</sup>                                                          |                |
| Absorption coefficient            | 0.578 mm <sup>-1</sup>                                                           |                |
| F(000)                            | 2036                                                                             |                |
| Crystal size                      | 0.49 x 0.27 x 0.09 mm <sup>3</sup>                                               |                |
| Theta range for data collection   | 1.69 to 25.69°.                                                                  |                |
| Index ranges                      | -11 ≤ h ≤ 11, -41 ≤ k ≤ 49, -15 ≤ l ≤ 10                                         |                |
| Reflections collected             | 27016                                                                            |                |
| Independent reflections           | 9256 [R(int) = 0.1470]                                                           |                |
| Completeness to theta = 25.69°    | 99.8 %                                                                           |                |
| Absorption correction             | Analytical                                                                       |                |
| Max. and min. transmission        | 0.9498 and 0.7649                                                                |                |
| Refinement method                 | Full-matrix least-squares on F <sup>2</sup>                                      |                |
| Data / restraints / parameters    | 9256 / 0 / 589                                                                   |                |
| Goodness-of-fit on F <sup>2</sup> | 1.042                                                                            |                |
| Final R indices [I > 2σ(I)]       | R1 = 0.0742, wR2 = 0.1952                                                        |                |
| R indices (all data)              | R1 = 0.1143, wR2 = 0.2139                                                        |                |
| Largest diff. peak and hole       | 0.767 and -0.717 e.Å <sup>-3</sup>                                               |                |
